# Supplementary material
Source: PubMed Central journal article supplement (PMC2148385)
Supplement: pnas_0706934104_3.pdf [file pnas_0706934104_3.pdf]

Heart-tube: Right side  
Heart-tube: Midline

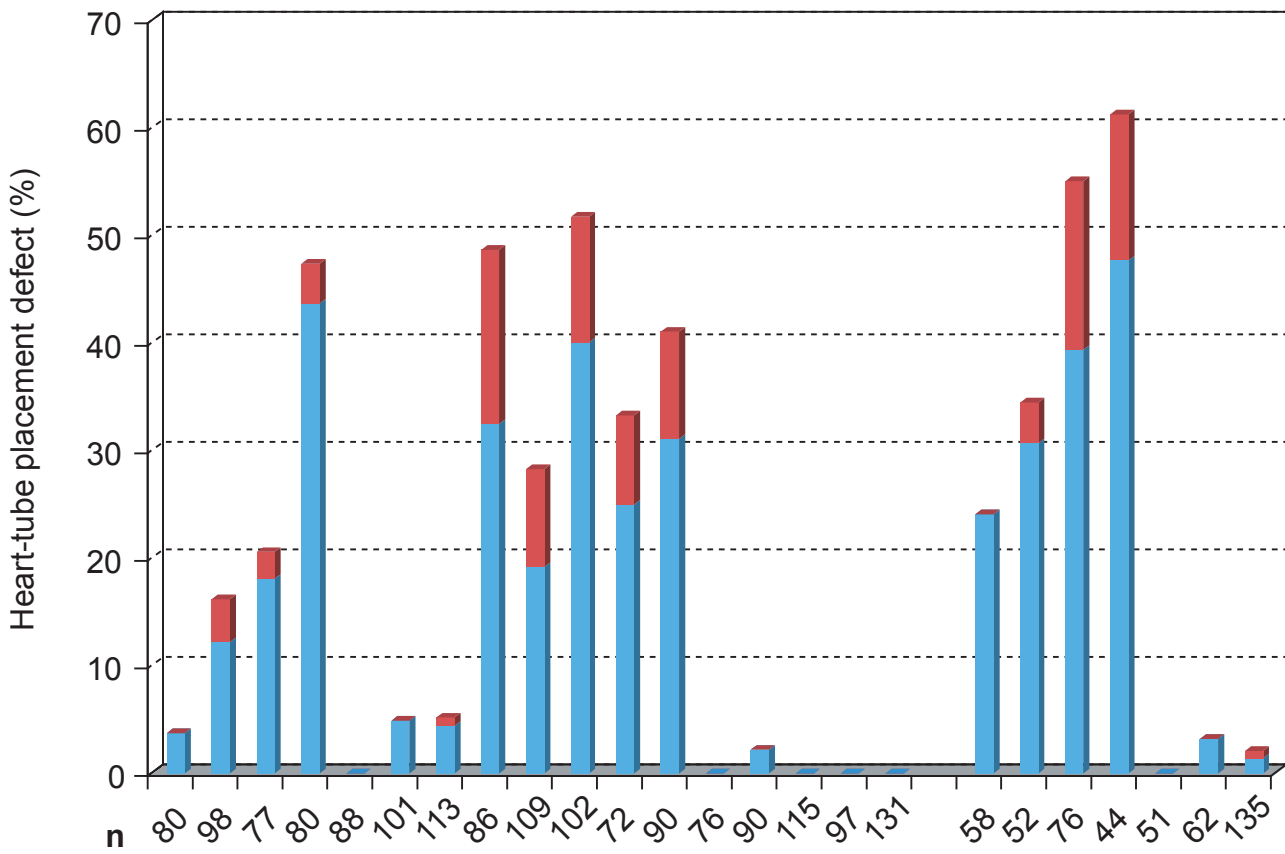

n

80 98 11 80 88 101 113 86 109 102 72 90 16 90 115 91 131 58 52 76 44 51 62 135

|                                      |   |   |   |   |   |   |   |   |   |   |   |   |   |   |   |   |   |   |   |   |   |   |
|--------------------------------------|---|---|---|---|---|---|---|---|---|---|---|---|---|---|---|---|---|---|---|---|---|---|
| <i>ipk1</i> <sup>MO1</sup> (2.5 ng)  | + | - | - | - | - | - | - | + | - | + | - | - | - | - | - | + | - | - | - | - | - | - |
| <i>ipk1</i> <sup>MO1</sup> (3.75 ng) | - | + | - | - | - | - | - | - | + | - | + | - | - | - | - | - | + | - | - | - | - | - |
| <i>ipk1</i> <sup>MO1</sup> (5.0 ng)  | - | - | + | - | - | - | - | - | - | - | - | - | - | - | - | - | - | + | - | - | - | - |
| <i>ipk1</i> <sup>MO1</sup> (7.5 ng)  | - | - | - | + | - | - | - | - | - | - | - | - | - | - | - | - | - | - | + | - | - | - |
| <i>ift88</i> <sup>MO</sup> (3.75 ng) | - | - | - | - | + | - | - | + | + | - | - | - | - | + | - | - | - | - | - | - | - | - |
| <i>ift88</i> <sup>MO</sup> (7.5 ng)  | - | - | - | - | - | + | - | - | - | - | - | - | - | - | - | - | - | - | - | - | - | - |
| <i>ift57</i> <sup>MO</sup> (0.67 ng) | - | - | - | - | - | - | + | - | - | - | + | + | - | - | - | + | - | - | - | - | - | - |
| <i>ift57</i> <sup>MO</sup> (1.0 ng)  | - | - | - | - | - | - | - | + | - | - | - | - | - | - | - | - | - | - | - | - | - | - |
| Control MO (3.75 ng)                 | - | - | - | - | - | - | - | - | - | - | - | - | + | - | + | + | - | - | - | + | - | - |
| Control MO (7.5 ng)                  | - | - | - | - | - | - | - | - | - | - | - | - | - | + | - | - | - | - | - | - | + | - |

Wild-type

*ift88*<sup>+/-</sup>
