# Supplementary material
Source: PubMed Central journal article supplement (PMC2148385)

Control MO  
injected (10 ng)

*ipk1*<sup>MO1</sup>  
injected (10 ng)

Pronephric ducts

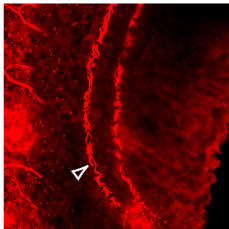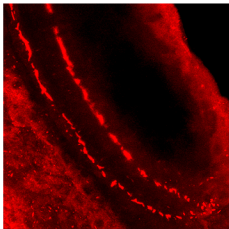

Spinal canal

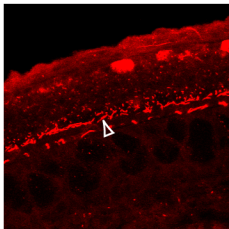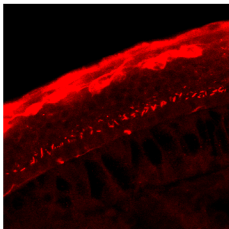

Supplement: pnas_0706934104_1.pdf [file pnas_0706934104_1.pdf]

Control MO  
injected

*ipk1*<sup>MO1</sup>  
injected

*krox20*

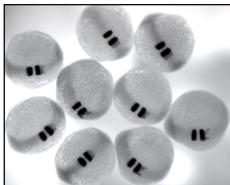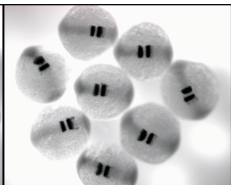

*myoD*

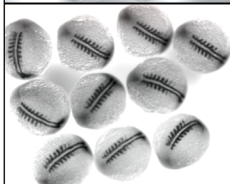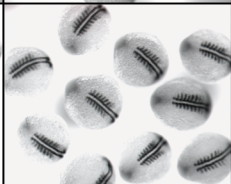

*deltaC*

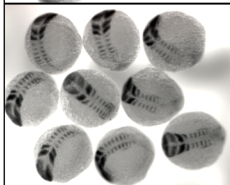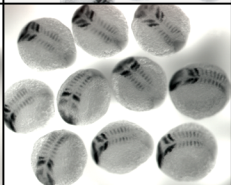

Supplement: pnas_0706934104_2.pdf [file pnas_0706934104_2.pdf]

**A**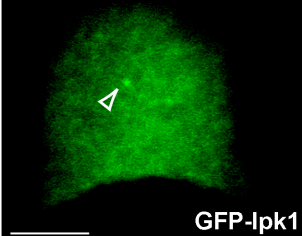**B**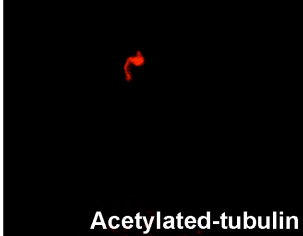**C**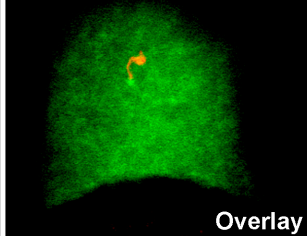

Supplement: pnas_0706934104_4.pdf [file pnas_0706934104_4.pdf]

**A**Control MO  
injected*ipk1*MO1  
injected $\gamma$ -tubulin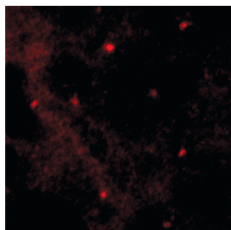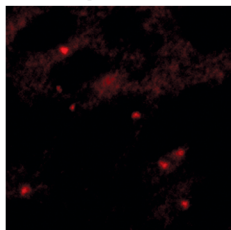 $\gamma$ -tubulin/DNA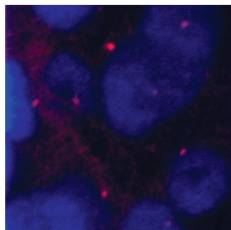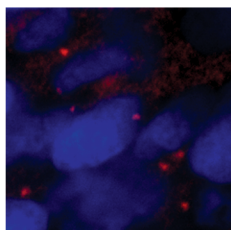**B**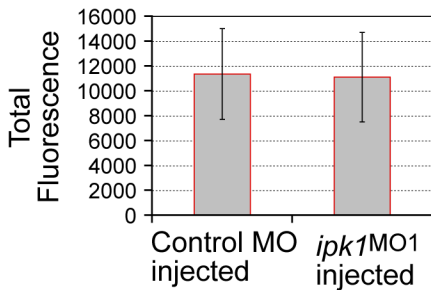

Supplement: pnas_0706934104_5.pdf [file pnas_0706934104_5.pdf]
